1 **Do we need to reconsider knee valgus as a sole risk factor for second**  
2 **ACL injury?**

3 **Exploratory analysis of individual Landing Error Scoring System (LESS) items**  
4 **with three year follow-up**

5  
6 Nicky van Melick, PhD<sup>1</sup>

7 Lisa van Rijn, PT, MSc<sup>2</sup>

8 Rob Bogie, MD, PhD<sup>1,3</sup>

9 Thomas J. Hoogeboom, PhD<sup>4</sup>

10

11 <sup>1</sup> Sports & Orthopedics Research Center, Anna Hospital, Bogardeind 2, 5664 EH Geldrop, the  
12 Netherlands

13 <sup>2</sup> Kniecentrum Plus, Jos Klijnenlaan 685B, 6164 AP Geleen, the Netherlands

14 <sup>3</sup> Department of orthopedic surgery, Anna Hospital, Bogardeind 2, 5664 EH Geldrop, the  
15 Netherlands

16 <sup>4</sup> Radboud university medical center, Research Institute for Health Sciences, IQ healthcare,  
17 Kapittelweg 54, 6525 EP Nijmegen, the Netherlands

18

19 **Corresponding author:**

20 Nicky van Melick, PhD

21 Sports & Orthopedics Research Center

22 Anna Hospital

23 Bogardeind 2

24 5664 EH Geldrop, the Netherlands

25 E-mail: [n.van.melick@st-anna.nl](mailto:n.van.melick@st-anna.nl)

26 Phone: 0031 402864273

27 **Abstract**

28 **Background:** It remains unclear which movement quality items are associated with second  
29 anterior cruciate ligament (ACL) injuries after ACL reconstruction.

30 **Hypotheses:** 1) Movement quality measured with the Landing Error Scoring System (LESS) is  
31 not associated with second ACL injury in soccer players who returned to sports after ACL  
32 reconstruction. 2) In an exploratory analysis, soccer players with and without second ACL  
33 injuries display differences in individual LESS items.

34 **Methods:** Fourteen male recreational ACL-reconstructed soccer players had non-fatigued and  
35 fatigued movement quality measurement with LESS score three years ago and were now  
36 interviewed by phone about soccer participation and second ACL injuries.

37 **Results:** Two soccer players did not return to soccer and were therefore excluded from  
38 analysis. Six of twelve (50%) included soccer players had a second ACL injury. There was no  
39 association between the non-fatigued ( $p=1.000$ ) and fatigued ( $p=0.455$ ) LESS score and  
40 second ACL injuries. However, when exploring individual LESS items, we found 50% of the  
41 soccer players with second ACL injury landing with little trunk and knee flexion displacement in  
42 combination with knee valgus, while none of the soccer players without second ACL injury had  
43 this combination of LESS errors. This difference was only seen in the fatigued state.

44 **Conclusions:** It might be the combination of little knee and trunk flexion displacement with knee  
45 valgus during landing which predisposes an athlete to a second ACL injury, especially in a  
46 fatigued state.

47 **Clinical relevance:** When screening athletes after ACL reconstruction for second ACL injury  
48 risk, combining measurement of knee valgus with knee and trunk flexion displacement in a  
49 fatigued state might be give more insight into risk than using the complete LESS score or  
50 evaluating knee valgus as a sole risk factor.

51 **Keywords:** ACL reconstruction, return to sport, knee valgus, second ACL injury

## 52 **1. Introduction**

53 Movement quality has become an increasingly popular tool to guide return to sport (RTS)  
54 decisions for athletes who want to return to pivoting sports after anterior cruciate ligament  
55 reconstruction (ACLR).<sup>2,13</sup> Several options are available to measure movement quality, ranging  
56 from lab-based measurements to relatively easy-to-use on-field measurements. An example of  
57 a frequently used movement quality measurement is the Landing Error Scoring System (LESS)  
58 which consists of 17 movement quality items, with a lower score representing better movement  
59 quality.<sup>9</sup> Padua et al. found an association between LESS score and primary ACL injuries in  
60 adolescent soccer athletes, and suggested a score of 5 as the optimal cut-off point, with a  
61 sensitivity of 85% and a specificity of 64%.<sup>10</sup> We, however, found no association between LESS  
62 score and second ACL injuries in adult athletes returning to pivoting sports after ACLR.<sup>15</sup>  
63 Despite the lack of scientific support for the predictive value of the LESS for second ACL  
64 injuries, many clinicians use the LESS as an instrument to determine whether an athlete is  
65 ready to safely return to pivoting sports after ACLR anyway.  
66 Perhaps, to maximize the predictive value of the LESS we need to consider other ways of  
67 analysing or applying the LESS. Two new approaches come to mind.  
68 First, individual LESS items or a combination of a few items might demonstrate a stronger  
69 predictive value for second ACL injuries than all LESS items together. Knee valgus is one of the  
70 items that clinicians always mention as being important in preventing second ACL injuries, but  
71 the only scientific evidence comes from studies focussing on primary ACL injuries.<sup>8</sup> Studies  
72 looking at second ACL injuries only showed that less hip external rotator moment during early  
73 landing and little knee flexion displacement during hop-and-hold test are important associated  
74 items.<sup>11,15</sup>  
75 Second, application of the LESS in fatigued athletes might also increase its predictive  
76 capacities. In a recent cross-sectional study we found LESS score measured on the soccer field  
77 to increase more in ACL-reconstructed recreational soccer players than in healthy recreational  
78 soccer players when comparing a sport-specific fatigued state to a non-fatigued state. We  
79 hypothesized that a higher fatigued LESS score might predispose the ACL-reconstructed  
80 soccer players to a second ACL injury.<sup>14</sup>  
81 In this exploratory study we aimed to investigate the plausibility of these new approaches of  
82 analyzing and applying the LESS. The first goal was to assess whether movement quality  
83 (measured on the soccer field with LESS score) in a non-fatigued or fatigued state is associated  
84 with second ACL injuries during a three-year follow-up in ACL-reconstructed male recreational  
85 soccer players who returned to soccer. The second goal was to explore whether individual  
86 LESS items or a combination of a few items - in both the non-fatigued and fatigued state -  
87 differed between soccer players who had a second ACL injury compared to those who did not  
88 have second ACL injury.

## 89 **2. Materials and Methods**

90 This retrospective exploratory case series is a three-year follow-up study of a previously  
91 published cross-sectional study comparing the effects of sport-specific fatigue on movement  
92 quantity and quality RTS measurements in healthy and ACL-reconstructed recreational soccer  
93 players.<sup>14</sup> RTS measurements were all performed on the soccer field and were taken at the end  
94 of rehabilitation ( $12.4 \pm 3.5$  months after surgery) for all ACL-reconstructed soccer players.  
95 Apart from a double-leg countermovement jump with LESS score, RTS measurements also  
96 included a single-leg hop test battery: vertical jump, hop for distance, and side hop.<sup>14</sup> The LESS  
97 has a good to excellent intrarater (ICC 0.82-0.99) and interrater (ICC 0.83-0.92) reliability.<sup>6</sup>  
98 All RTS measurements were performed in a non-fatigued state and in a sport-specific fatigued  
99 state. Fatigue was induced by a one-hour soccer training and the Borg RPE scale was used to  
100 express the amount of fatigue. Borg RPE scale was  $7.3 \pm 1.1$  during the non-fatigued RTS  
101 measurements and  $14.9 \pm 1.1$  during the fatigued measurements.<sup>14</sup>

102

### 103 *2.1 Participants and study procedure*

104 Three years after RTS measurements we asked all 14 ACL-reconstructed soccer players by  
105 phone to participate in this follow-up study. They received additional information about the study  
106 by e-mail and decided whether they wanted to partake afterwards. Once a soccer player agreed  
107 to participate in this follow-up study, a 10-minute interview by phone was scheduled. A  
108 standardised survey about soccer participation and second ACL injuries was used to guide this  
109 interview.

110 All subjects gave informed consent for participation in this follow-up study. The medical ethics  
111 committee of the Máxima Medisch Centrum Eindhoven (the Netherlands) deemed that our study  
112 did not fall within the remit of the Medical Research Involving Human Subjects Act (N19.117).

113

### 114 *2.2 Statistical analyses*

115 There were no missing values. For all soccer players who returned to soccer, descriptive  
116 statistics were used to present age, height, weight, operated leg, dominant leg, soccer exposure  
117 in months, non-fatigued LESS score and fatigued LESS score.

118 To analyse differences in baseline characteristics for soccer players who had a second ACL  
119 injury and those who had not independent samples t-tests (continuous variables) or chi-square  
120 tests (nominal variables) were performed. Soccer players who did not return to soccer (or any  
121 other pivoting sport) were excluded from analyses, because they had a lower chance for a  
122 second ACL injury attributable to much lower risk exposure.

123 The association between non-fatigued or fatigued LESS score and second ACL injury rate when  
124 returning to soccer was investigated using Fisher's exact test. LESS score was expressed as a  
125 dichotomous variable (meeting RTS criterion of  $\leq 5$  yes or no). Analysis were performed for the

126 non-fatigued and fatigued state separately. The absolute risk (AR) was calculated with  
127 crosstabs, comparing soccer players who did not meet the LESS criterion of  $\leq 5$  with those who  
128 did meet the LESS criterion.

129 Individual LESS items were analysed in an explorative way. For every item, both in the non-  
130 fatigued and fatigued state, the number and percentage of soccer players with and without  
131 second ACL injury not meeting the item was described. We arbitrarily deemed a  $\geq 50\%$   
132 difference between groups sufficient to identify clinically meaningful differences and to minimise  
133 findings based on chance.

134

### 135 3. Results

136 All 14 ACL-reconstructed soccer players agreed to participate in this follow-up study. Two of  
137 them had not returned to soccer (or any other pivoting sport) after ACLR due to complaints of  
138 the operated knee and were therefore excluded from analyses. The other 12 ACL-reconstructed  
139 soccer players returned to recreational level competitive soccer and were included in the  
140 analyses (Figure 1).

141

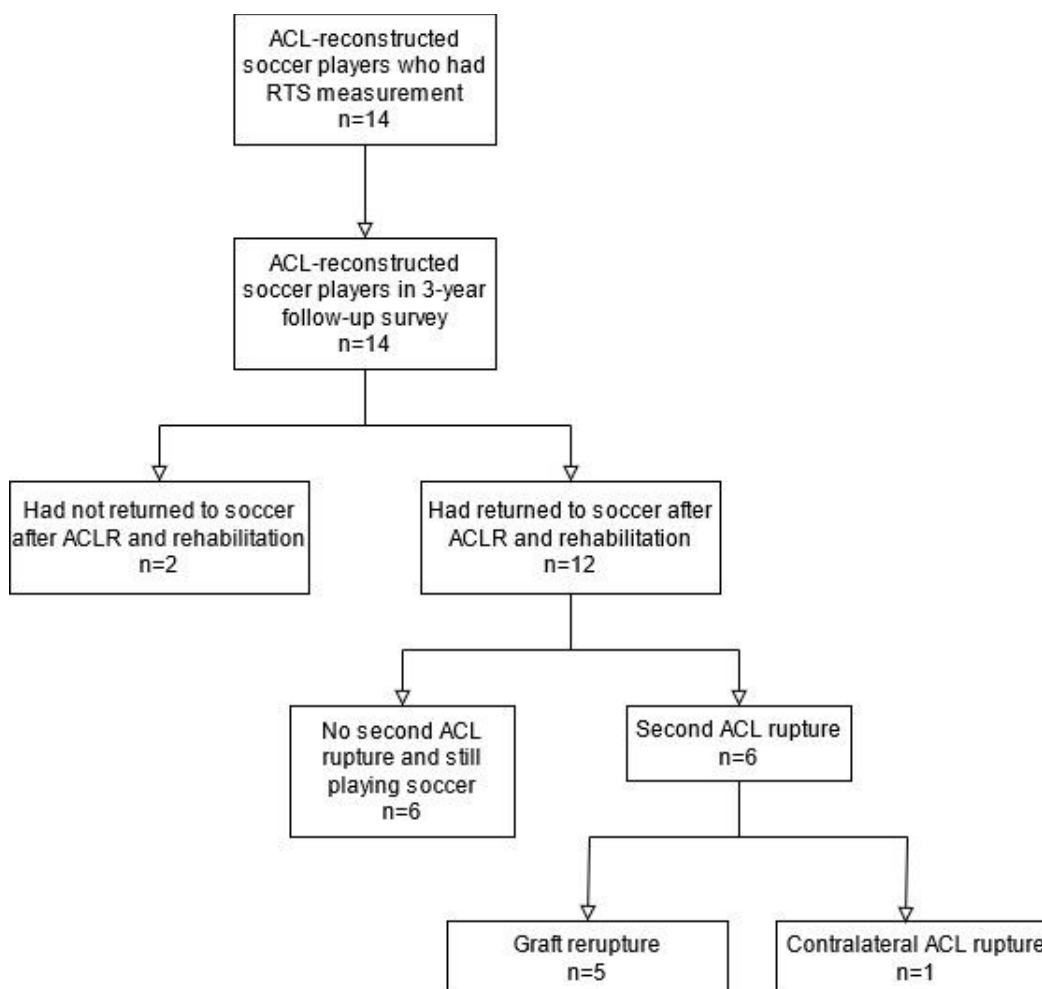

142

143 **Figure 1: Flowchart of ACL-reconstructed soccer players.**

144 **3.1 Second ACL injuries**

145 Descriptives for all ACL-reconstructed soccer players separately are presented in Table 1. Six  
 146 soccer players (50%) had a second ACL injury during the three-year follow-up period. Five were  
 147 non-contact graft reruptures and one was a non-contact contralateral ACL rupture (soccer  
 148 player 6). Second ACL ruptures occurred between 1 and 24 months after returning to soccer  
 149 (median 4.5 months). Four soccer players ruptured their ACL during training, the other two  
 150 during a game. Second ACL injuries happened within 30 to 80 minutes (median 60 minutes)  
 151 from the beginning of training or game.

152

**Table 1: Descriptives for all ACL-Reconstructed Soccer Players separately.**

| Soccer player | Second ACL rupture? | Soccer exposure in months | Reinjury during game or training? | In-game/training timing in minutes | Non-fatigued LESS score | Fatigued LESS score |
|---------------|---------------------|---------------------------|-----------------------------------|------------------------------------|-------------------------|---------------------|
| 1             | Yes                 | 1                         | Training                          | 80                                 | 3                       | 3                   |
| 2             | Yes                 | 24                        | Training                          | 30                                 | 6                       | 10                  |
| 3             | Yes                 | 2                         | Game                              | 70                                 | 1                       | 6                   |
| 4             | Yes                 | 8                         | Game                              | 70                                 | 4                       | 7                   |
| 5             | Yes                 | 6                         | Training                          | 50                                 | 4                       | 8                   |
| 6             | Yes                 | 3                         | Training                          | 40                                 | 4                       | 6                   |
| 7             | No                  | 34                        | n.a.                              | n.a.                               | 4                       | 6                   |
| 8             | No                  | 35                        | n.a.                              | n.a.                               | 2                       | 6                   |
| 9             | No                  | 36                        | n.a.                              | n.a.                               | 4                       | 7                   |
| 10            | No                  | 36                        | n.a.                              | n.a.                               | 4                       | 6                   |
| 11            | No                  | 34                        | n.a.                              | n.a.                               | 2                       | 6                   |
| 12            | No                  | 36                        | n.a.                              | n.a.                               | 5                       | 8                   |

153

154 **3.2 Association between LESS score and second ACL injuries**

155 Characteristics of soccer players with second ACL injury did not significantly differ from soccer  
 156 players without second ACL injury (Table 2). In the non-fatigued state one soccer player did not  
 157 meet the LESS criterion of  $\leq 5$  and he had a second ACL injury. In the fatigued state one soccer  
 158 players did meet the LESS RTS criterion, but he had a second ACL injury (Table 1). Fisher's  
 159 exact test showed no association between not meeting the non-fatigued ( $p=1.00$ ; AR 100%  
 160 versus 45%) or fatigued ( $p=0.46$ ; AR 45% versus 100%) LESS RTS criterion and second ACL  
 161 injuries.

**Table 2: Characteristics of ACL-Reconstructed Soccer Players with and without Second ACL Injury.**

|                                         | Soccer players with second ACL injury | Soccer players without second ACL injury | p-value |
|-----------------------------------------|---------------------------------------|------------------------------------------|---------|
| Age in years, mean $\pm$ SD             | 20.7 $\pm$ 2.7                        | 23.8 $\pm$ 2.9                           | 0.130   |
| Height in m, mean $\pm$ SD              | 181.3 $\pm$ 3.2                       | 177.8 $\pm$ 8.7                          | 0.378   |
| Weight in kg, mean $\pm$ SD             | 80.7 $\pm$ 5.3                        | 75.5 $\pm$ 10.5                          | 0.308   |
| ACLR leg, N (%) right                   | 2 (33%)                               | 3 (50%)                                  | 0.558   |
| Dominant leg = operated leg?, N (%) yes | 2 (33%)                               | 4 (66%)                                  | 0.248   |
| Non-fatigued LESS score, mean $\pm$ SD  | 3.7 $\pm$ 1.6                         | 3.5 $\pm$ 1.2                            | 0.845   |
| Fatigued LESS score, mean $\pm$ SD      | 6.7 $\pm$ 2.3                         | 6.5 $\pm$ 0.8                            | 0.873   |

162  
163 *3.3 Exploratory analysis of LESS items*  
164 Exploring individual LESS items, three  $\geq 50\%$  differences were found between soccer players  
165 with second ACL injury and those without second ACL injury, all three in the fatigued state  
166 (Table 3).  
167 In the fatigued state soccer players with second ACL injury:  
168 • less often had a small knee flexion angle ( $\leq 30^\circ$ ) at initial contact compared to those without  
169 second ACL injury (Item 1: 17% respectively 67%);  
170 • more often had little knee flexion displacement ( $< 45^\circ$ ) from initial contact to maximal knee  
171 flexion compared to those without second ACL injury (Item 12: 67% respectively 0%);  
172 • more often had no trunk flexion displacement between initial contact and maximal knee  
173 flexion compared to those without second ACL injury (Item 14: 50% respectively 0%).  
174 The occurrence of knee valgus (both item 5 and 15) did not differ between soccer players with  
175 or without second ACL injury, nor in the non-fatigued and in the fatigued state.  
176 When combining items, three (50%) of the soccer players with second ACL injury had an error  
177 on item 12, 14 and 15, indicating little knee and trunk flexion displacement combined with knee  
178 valgus, while non of the soccer players without second ACL injury had this combination of items  
179 (see Appendix).

**Table 3: Exploratory Analysis of Individual LESS Items and Differences between Soccer Players with and without Second ACL Injury.**

| State        | LESS item | Not meeting item if                                                                                                     | Number (%) of soccer players with second ACL injury not meeting item | Number (%) of soccer players without second ACL injury not meeting item |
|--------------|-----------|-------------------------------------------------------------------------------------------------------------------------|----------------------------------------------------------------------|-------------------------------------------------------------------------|
| Non-fatigued | 1         | Knee flexion angle $\leq 30^\circ$ (initial contact)                                                                    | 0 (0)                                                                | 1 (17)                                                                  |
|              | 2         | The thigh of test leg is in line with the trunk (initial contact)                                                       | 0 (0)                                                                | 0 (0)                                                                   |
|              | 3         | The trunk is vertical or extended on the hips (initial contact)                                                         | 0 (0)                                                                | 0 (0)                                                                   |
|              | 4         | If the foot lands heel to toe or flat                                                                                   | 0 (0)                                                                | 0 (0)                                                                   |
|              | 5         | A line straight down from the center of the patella is medial to the midfoot (initial contact)                          | 2 (33)                                                               | 3 (50)                                                                  |
|              | 6         | The midline of the trunk is flexed to the right or left side (initial contact)                                          | 4 (67)                                                               | 2 (33)                                                                  |
|              | 7         | A line down from the tip of the shoulders is inside the foot (entire foot contact)                                      | 3 (50)                                                               | 3 (50)                                                                  |
|              | 8         | A line down from the tip of the shoulders is outside the foot (entire foot contact)                                     | 2 (33)                                                               | 1 (17)                                                                  |
|              | 9         | The foot is internally rotated $>30^\circ$ (between initial contact and maximal knee flexion)                           | 0 (0)                                                                | 0 (0)                                                                   |
|              | 10        | The foot is externally rotated $>30^\circ$ (between initial contact and maximal knee flexion)                           | 0 (0)                                                                | 0 (0)                                                                   |
|              | 11        | One foot lands before the other or if one foot lands heel to toe and the other toe to heel                              | 1 (17)                                                               | 2 (33)                                                                  |
|              | 12        | The knee flexes $<45^\circ$ (between initial contact and maximal knee flexion)                                          | 2 (33)                                                               | 0 (0)                                                                   |
|              | 13        | The thigh does not flex more on the trunk (between initial contact and maximal knee flexion)                            | 0 (0)                                                                | 0 (0)                                                                   |
|              | 14        | The trunk does not flex more (between initial contact and maximal knee flexion)                                         | 0 (0)                                                                | 0 (0)                                                                   |
|              | 15        | A line straight down from the center of the patella runs through or is medial to the great toe (at maximum knee valgus) | 5 (83)                                                               | 4 (67)                                                                  |



|          |    |                                                                                                                         |        |        |
|----------|----|-------------------------------------------------------------------------------------------------------------------------|--------|--------|
| Fatigued | 1  | Knee flexion angle $\leq 30^\circ$ (initial contact)                                                                    | 1 (17) | 4 (67) |
|          | 2  | The thigh of test leg is in line with the trunk (initial contact)                                                       | 0 (0)  | 1 (17) |
|          | 3  | The trunk is vertical or extended on the hips (initial contact)                                                         | 1 (17) | 1 (17) |
|          | 4  | If the foot lands heel to toe or flat                                                                                   | 0 (0)  | 1 (17) |
|          | 5  | A line straight down from the center of the patella is medial to the midfoot (initial contact)                          | 4 (67) | 3 (50) |
|          | 6  | The midline of the trunk is flexed to the right or left side (initial contact)                                          | 3 (50) | 3 (50) |
|          | 7  | A line down from the tip of the shoulders is inside the foot (entire foot contact)                                      | 2 (33) | 4 (67) |
|          | 8  | A line down from the tip of the shoulders is outside the foot (entire foot contact)                                     | 3 (50) | 1 (17) |
|          | 9  | The foot is internally rotated $>30^\circ$ (between initial contact and maximal knee flexion)                           | 0 (0)  | 0 (0)  |
|          | 10 | The foot is externally rotated $>30^\circ$ (between initial contact and maximal knee flexion)                           | 2 (33) | 2 (33) |
|          | 11 | One foot lands before the other or if one foot lands heel to toe and the other toe to heel                              | 1 (17) | 3 (50) |
|          | 12 | The knee flexes $<45^\circ$ (between initial contact and maximal knee flexion)                                          | 4 (67) | 0 (0)  |
|          | 13 | The thigh does not flex more on the trunk (between initial contact and maximal knee flexion)                            | 1 (33) | 0 (0)  |
|          | 14 | The trunk does not flex more (between initial contact and maximal knee flexion)                                         | 3 (50) | 0 (0)  |
|          | 15 | A line straight down from the center of the patella runs through or is medial to the great toe (at maximum knee valgus) | 5 (83) | 5 (83) |

#### 181 **4. Discussion**

182 This study showed there is no association between non-fatigued and fatigued LESS score and  
183 second ACL injuries in ACL-reconstructed recreational soccer players who returned to soccer.  
184 However, when exploring individual LESS items or a combination of a few items in the fatigued  
185 state, 50% of the soccer players with second ACL injury had little knee and trunk flexion  
186 displacement combined with knee valgus during landing. None of the soccer players without  
187 second ACL injury had this combination of items: they also had knee valgus, but with greater  
188 knee and trunk flexion displacement. Interestingly, soccer players with second ACL injury more  
189 often had a greater knee flexion angle at initial contact.

190  
191 Despite the small sample of this exploratory cohort study, these findings are in line with a  
192 previous study of our group in which we found no association between LESS score and second  
193 ACL injury rate in adult athletes returning to pivoting sports after ACLR.<sup>15</sup> In the same study, we  
194 found less knee flexion displacement during hop-and-hold test to be associated with second  
195 ACL injuries.<sup>15</sup> Also, biomechanical studies have indicated that proximal factors influence knee  
196 loading, and that actively flexing the trunk produces concomitant increases in hip and knee  
197 flexion.<sup>1,12</sup> Coupling of proximal and distal joints increases the demands on the hip extensors  
198 (i.e. gluteal muscles, hamstrings) and decreases the demands on the knee extensors and  
199 thereby lowers the strain on the ACL.<sup>12</sup> ACL injuries happen short (40-70 ms) after initial contact  
200 and quick absorption of ground reaction forces by flexing the trunk and knee could potentially  
201 protect the ACL from rupturing, even when knee valgus is occurring.<sup>1,3</sup> Probably, knee and trunk  
202 flexion at initial contact are of less importance, since more soccer players without second ACL  
203 injury had a small knee flexion angle at that time point compared to the soccer players with  
204 second ACL injury.

205 Since almost all soccer players in this study (83%) had knee valgus during landing in the  
206 fatigued state, this individual item might not be a sole risk factor for second ACL injury. It might  
207 be the combination of little knee and trunk flexion displacement and knee valgus during landing  
208 which predisposes an athlete to second ACL injury, especially in a fatigued state.

209  
210 It could be questioned whether our group of ACL-reconstructed soccer players had low-quality  
211 rehabilitation. To be included in our previous study measuring RTS tests on the soccer field,  
212 soccer players were recruited via experienced sports physical therapists who worked according  
213 to ACLR practice guidelines.<sup>13,14</sup> While quality of the rehabilitation process could never be  
214 completely transparent, we think these soccer players all had a high-quality rehabilitation,  
215 including strength training, neuromuscular training, on-field training and multiple test moments.  
216 However, in future more attention should be paid to avoiding an erect landing posture in  
217 combination with knee valgus, especially when being fatigued.

218 Besides, we postulate that well-known RTS test batteries including strength tests, hop tests, and  
219 movement quality measurements with LESS need to be critically reviewed. Since strength and  
220 hop tests have an association with second ACL injuries in athletes who return to pivoting sports  
221 in multiple studies, we believe these are minimal RTS requirements.<sup>4,5,7,15</sup> When using  
222 movement quality RTS tests, we advise analyzing individual items in a (sport specific) fatigued  
223 state, because these individual LESS items might give more insight into second ACL injury risk.

224

## 225 **5. Conclusion**

226 There is no associated between non-fatigued or fatigued LESS score and second ACL injury in  
227 ACL-reconstructed recreational soccer players who returned to soccer. However, soccer players  
228 with second ACL injury more often had little knee and trunk flexion displacement in the fatigued  
229 state, while there were no differences in the occurrence of knee valgus. We postulate that knee  
230 valgus is not the sole factor in second ACL injury risk. It might be the combination of little knee  
231 and trunk flexion displacement with knee valgus during landing which predisposes an athlete to  
232 a second ACL injury, especially in a fatigued state.

## 233 **References**

- 234 1. Blackburn JT, Padua DA. Influence of trunk flexion on hip and knee joint kinematics during a  
235 controlled drop landing. *Clin Biomech.* 2008;23(3):313-319.
- 236 2. Davies GJ, McCarty E, Provencher M, Manske RC. ACL Return to sport guidelines and  
237 criteria. *Curr Rev Musculoskelet Med.* 2017;10(3):307-314.
- 238 3. Della Villa F, Buckthorpe M, Grassi A, et al. Systematic video analysis of ACL injuries in  
239 professional male football (soccer): injury mechanisms, situational patterns and  
240 biomechanics study on 134 consecutive cases. *Br J Sports Med.* 2020;54(23):1423-1432.
- 241 4. Grindem H, Snyder-Mackler L, Moksnes H, Engebretsen L, Risberg MA. Simple decision  
242 rules can reduce reinjury risk by 84% after ACL reconstruction: the Delaware-Oslo ACL  
243 cohort study. *Br J Sports Med.* 2016;50(13):804-808.
- 244 5. Grindem H, Engebretsen L, Axe M, Snyder-Mackler L, Risberg MA. Activity and functional  
245 readiness, not age, are the critical factors for second anterior cruciate ligament injury - the  
246 Delaware-Oslo ACL cohort study. *Br J Sports Med.* 2020;54(18):1099-1102.
- 247 6. Hanzlíková I, Hébert-Losier K. Is the landing Error Scoring System reliable and valid? A  
248 systematic review. *Sports Health.* 2020;12(2):181-188.
- 249 7. Kyritsis P, Bahr R, Landreau P, Miladi R, Witvrouw E. Likelihood of ACL graft rupture: not  
250 meeting six clinical discharge criteria before return to sport is associated with a four times  
251 greater risk of rupture. *Br J Sports Med.* 2016;50(15):946-951.
- 252 8. Larwa J, Stoy C, Chafetz RS, Boniello M, Franklin C. Stiff landings, core stability, and  
253 dynamic knee valgus: a systematic review on documented anterior cruciate ligament  
254 ruptures in male and female athletes. *Int J Environ Res Public Health.* 2021;18(7):3826.
- 255 9. Padua DA, Marshall SW, Boling MC, Thigpen CA, Garrett Jr WE, Beutler AI. The Landing  
256 Error Scoring System (LESS) is a valid and reliable clinical assessment tool of jump-landing  
257 biomechanics: The JUMP-ACL study. *Am J Sports Med.* 2009;37(10):1996-2002.
- 258 10. Padua DA, DiStefano LJ, Beutler AI, de la Motte SJ, DiStefano MJ, Marshall SW. The  
259 Landing Error Scoring System as a screening tool for an anterior cruciate ligament injury-  
260 prevention program in elite youth soccer athletes. *J Athl Train.* 2015;50(6):589-595.
- 261 11. Paterno MV, Schmitt LC, Ford KR, et al. Biomechanical measures during landing and  
262 postural stability predict second anterior cruciate ligament injury after anterior cruciate  
263 ligament reconstruction and return to sport. *Am J Sports Med.* 2010;38(10):1968-1978.
- 264 12. Powers CM. The influence of abnormal hip mechanics on knee injury: a biomechanical  
265 perspective. *J Orthop Sports Phys Ther.* 2010;40(2):42-51.
- 266 13. van Melick N, van Cingel REH, Brooijmans F, et al. Evidence-based clinical practice update:  
267 practice guidelines for anterior cruciate ligament rehabilitation based on a systematic review  
268 and multidisciplinary consensus. *Br J Sports Med.* 2016;50(24):1506–1515.

- 269 14. van Melick N, van Rijn L, Nijhuis-van der Sanden MWG, Hoogeboom TH, van Cingel REH.  
270 Fatigue affects quality of movement more in ACL-reconstructed soccer players than in  
271 healthy soccer players. *Knee Surg Sports Traumatol Arthrosc.* 2019;27(2):549-555.
- 272 15. van Melick N, Pronk Y, Nijhuis-van der Sanden MWG, Rutten S, van Tienen TG,  
273 Hoogeboom TH. Meeting movement quantity or quality return to sport criteria is associated  
274 with reduced second ACL injury rate. *J Orthop Res.* 2022;40(1):117-128.

275 **Appendix: Exploratory analysis of individual LESS items per soccer player in the fatigued state**

276

|              | Soccer player |   |   |   |   |   |   |   |   |    |    |    |
|--------------|---------------|---|---|---|---|---|---|---|---|----|----|----|
|              | 1             | 2 | 3 | 4 | 5 | 6 | 7 | 8 | 9 | 10 | 11 | 12 |
| LESS item 1  |               |   | X |   |   |   | X |   | X | X  | X  |    |
| LESS item 2  |               |   |   |   |   |   |   |   |   |    | X  |    |
| LESS item 3  |               | X |   |   |   |   |   |   | X |    |    |    |
| LESS item 4  |               |   |   |   |   |   |   |   |   |    |    | X  |
| LESS item 5  | X             | X | X | X |   |   | X |   |   | X  |    | X  |
| LESS item 6  |               |   | X | X | X |   |   | X |   | X  |    | X  |
| LESS item 7  |               | X |   | X |   |   | X |   | X |    | X  | X  |
| LESS item 8  |               |   | X |   | X | X |   | X |   |    |    |    |
| LESS item 9  |               |   |   |   |   |   |   |   |   |    |    |    |
| LESS item 10 |               | X |   |   |   | X | X |   |   |    | X  |    |
| LESS item 11 |               |   | X |   |   |   |   | X | X |    |    | X  |
| LESS item 12 |               | X |   | X | X | X |   |   |   |    |    |    |
| LESS item 13 |               |   |   |   | X |   |   |   |   |    |    |    |
| LESS item 14 |               | X |   | X | X |   |   |   |   |    |    |    |
| LESS item 15 |               | X | X | X | X | X | X | X |   | X  | X  | X  |

An "X" indicates an error on a specific LESS item.

277
